# Supplementary material for: High Prevalence of Diabetes in Patients With Primary Aldosteronism (PA) Associated With Subclinical Hypercortisolism and Prediabetes More Prevalent in Bilateral Than Unilateral PA: A Large, Multicenter Cohort Study in Japan
Source: Oxford University Press journal article supplement (doi:10.2337/dc18-1293), 2019-03-27
Supplement: dc181293supplementarydata.pdf [file dc181293supplementarydata.pdf]

SUPPLEMENTARY DATA

**Supplementary Table S1.** Characteristics of patients with primary aldosteronism

| variables |                              | all patients (n=2210) |
|-----------|------------------------------|-----------------------|
| age       | (y.o)                        | 53.5 ± 11.1           |
| Sex       |                              | M 1076 / F 1134       |
| BMI       | (kg/m <sup>2</sup> )         | 24.9 ± 4.2            |
| S-BP      | (mmHg)                       | 140 (128-152)         |
| D-BP      | (mmHg)                       | 86 (78-95)            |
| Na        | (mEq/L)                      | 142.0 (141.0-143.3)   |
| K         | (mEq/L)                      | 3.8 (3.4-4.0)         |
| Cr        | (mg/dL)                      | 0.7 (0.60-0.86)       |
| e-GFR     | (mL/min/1.73m <sup>2</sup> ) | 79.4 ± 20.1           |
| TC        | (mg/dL)                      | 191.7 ± 33.6          |
| TG        | (mg/dL)                      | 106 (76-152)          |
| HDL-C     | (mg/dL)                      | 52.8 (44.0-64.0)      |
| FPG       | (mg/dL)                      | 98 (91-109)           |
| HbA1c     | (%)                          | 5.6 (4.2-14.6)        |
| PAC       | (pg/mL)                      | 177 (125-288)         |
| PRA       | (ng/mL/h)                    | 0.3 (0.2-0.5)         |
| ARR       |                              | 574 (328-1187)        |
| F-1mgDST  | (µg/dL)                      | 1.2 (0.8-1.8)         |

Data are shown as the mean ± SD, median (25th–75th percentiles), or raw numbers.

ARR, aldosterone renin ratio; BMI, body mass index; D-BP, diastolic blood pressure; e-GFR estimate glomerular filtration rate; F-1mgDST, serum cortisol concentration after 1-mg dexamethasone suppression test; FPG, fasting plasma glucose; HDL-C, high-density lipoprotein cholesterol; PAC, plasma aldosterone concentration; PRA, plasma renin activity; S-BP, systolic blood pressure; TC, total cholesterol; TG, triglyceride.

SUPPLEMENTARY DATA

**Supplementary Table S2.** Prevalence of diabetes mellitus in indicated age groups of patients with PA and controls

|        |         | Total (30-69 y.o.) | 30-39 y.o.     | 40-49 y.o.       | 50-59 y.o.       | 60-69 y.o.        |
|--------|---------|--------------------|----------------|------------------|------------------|-------------------|
| Male   | PA      | 263/998 (26.4) **  | 7/113 (6.2) *  | 55/267 (20.6) ** | 94/336 (28.0) ** | 107/282 (37.9) ** |
|        | Control | 380/2845 (13.4)    | 5/395 (1.3)    | 22/583 (3.8)     | 75/592 (12.7)    | 278/1275 (21.8)   |
| Female | PA      | 163/1036 (15.7) ** | 6/109 (5.5) ** | 26/272 (9.6) **  | 59/342 (17.3) ** | 72/313 (23.0) **  |
|        | Control | 290/4324 (6.7)     | 5/679 (0.7)    | 17/928 (1.8)     | 60/980 (6.1)     | 208/1737 (12.0)   |

Data are shown as raw numbers (%). PA vs. Control, \*  $p < 0.01$ , \*\*  $p < 0.001$

**Supplementary Table S3.** Effects of selected variables on differences between  $HbA_{1c} < 6.5\%$  and suspected ( $HbA_{1c} \geq 6.5\%$ ) or previously diagnosed diabetes mellitus after adjusting for age, sex and BMI (n=2210)

| variables                                 | Odds ratio | 95% confidence interval | p-value |
|-------------------------------------------|------------|-------------------------|---------|
| Age                                       | 1.064      | 1.047 - 1.082           | < 0.001 |
| Sex (male =1, female =2)                  | 0.728      | 0.517 - 1.026           | 0.070   |
| BMI                                       | 1.085      | 1.042 - 1.131           | < 0.001 |
| Hypokalemia (hypokalemia=1, eukalemia =2) | 1.005      | 0.992 - 1.017           | 0.478   |
| TC                                        | 0.995      | 0.989 - 1.001           | 0.076   |
| TG                                        | 1.003      | 1.000 - 1.005           | 0.042   |
| HDL-C                                     | 0.987      | 0.973 - 1.000           | 0.058   |
| PAC                                       | 1.000      | 0.999 - 1.001           | 0.774   |
| F-1mgDST (<1.8 =1, $\geq 1.8=2$ )         | 1.786      | 1.268 - 2.514           | < 0.001 |

BMI, body mass index; F-1mgDST, serum cortisol concentration after 1-mg dexamethasone suppression test; HDL-C, high-density lipoprotein cholesterol; PAC, plasma aldosterone concentration; TC, total cholesterol; TG, triglyceride.

SUPPLEMENTARY DATA

**Supplementary Table S4.** Effects of selected variables including localization of PA, on the difference between HbA<sub>1c</sub><6.5% and suspected (HbA<sub>1c</sub> ≥6.5%) or previously diagnosed diabetes mellitus after adjusting for age, sex and BMI (n=1386)

| variables                                        | Odds ratio | 95% confidence interval | <i>p</i> -value |
|--------------------------------------------------|------------|-------------------------|-----------------|
| Age                                              | 1.062      | 1.040 - 1.084           | < 0.001         |
| Sex (male =1, female =2)                         | 0.615      | 0.396 - 0.954           | 0.030           |
| BMI                                              | 1.098      | 1.043 - 1.157           | < 0.001         |
| Hypokalemia (hypokalemia=1, eukalemia =2)        | 1.000      | 0.983 - 1.018           | 0.986           |
| TC                                               | 0.995      | 0.988 - 1.002           | 0.145           |
| TG                                               | 1.002      | 1.000 - 1.005           | 0.354           |
| HDL-C                                            | 0.992      | 0.973 - 1.000           | 0.368           |
| PAC                                              | 1.000      | 0.999 - 1.001           | 0.442           |
| F-1mgDST (<1.8 =1, ≥1.8=2)                       | 1.809      | 1.143 - 2.866           | 0.011           |
| Localization of PA (unilateral =1, Bilateral =2) | 1.156      | 0.722 - 1.849           | 0.546           |

BMI, body mass index; F-1mgDST, serum cortisol concentration after 1-mg dexamethasone suppression test; HDL-C, high-density lipoprotein cholesterol; PAC, plasma aldosterone concentration; TC, total cholesterol; TG, triglyceride.
